# Supplementary material for: Pathomics Image Analysis of Tumor Infiltrating Lymphocytes (TILs) in Colon Cancer
Source: Research Square preprint supplement (doi:10.21203/rs.3.rs-6173056/v1), 2025-04-01
Supplement: Supplementary file 1 [file 408cccea4d3441dcecca3945.docx]

**Supplementary Data**


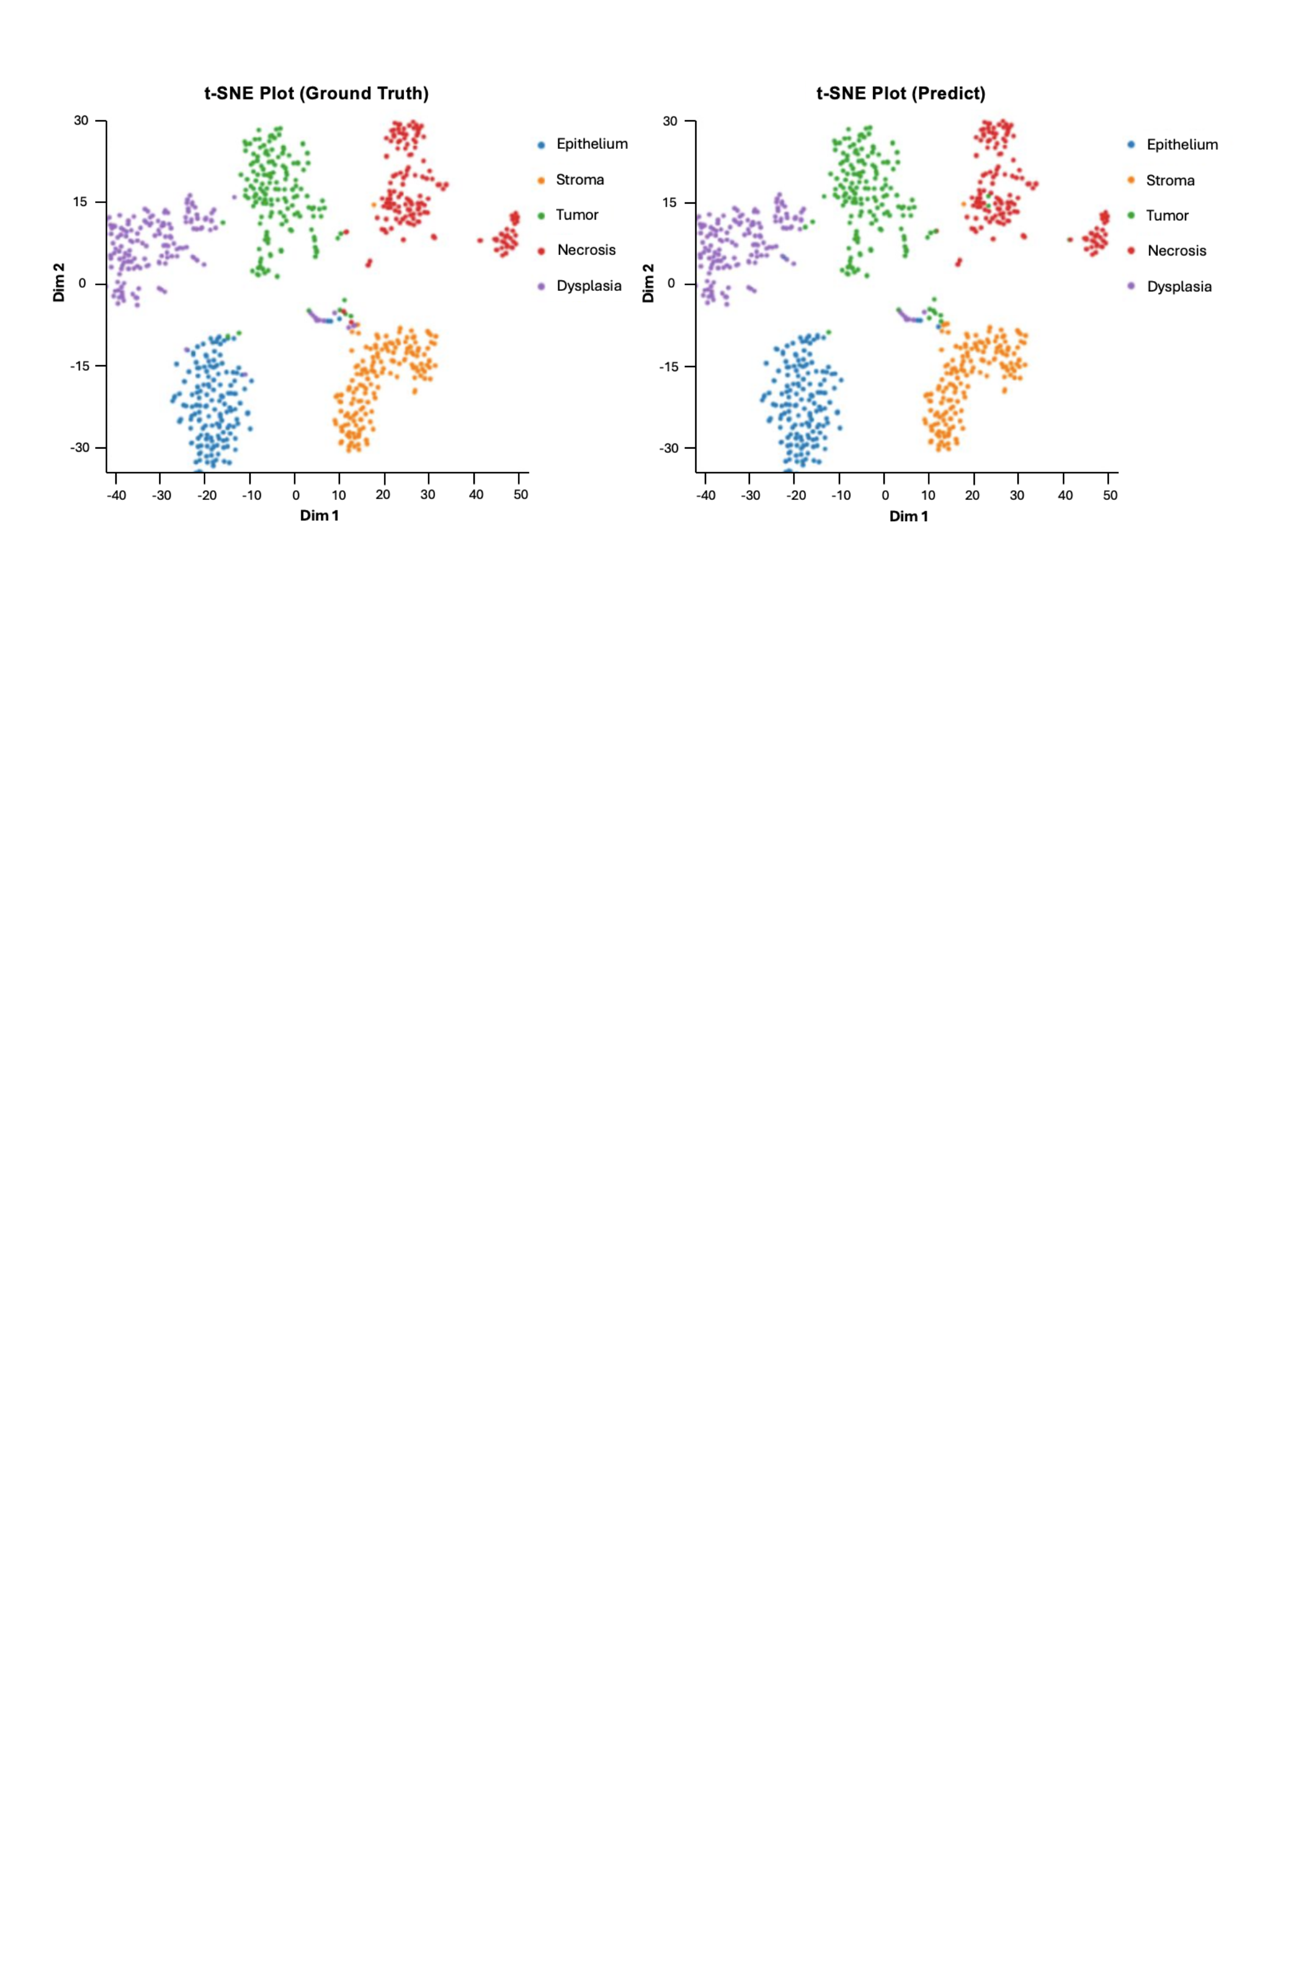


**Supplementary Data 1.** t-SNE visualization of ground truth and SBU colon cancer detection model predictions. Comparing ground truth (left) and model-predicted (right) histological categories in the SBU colon cancer detection model. Clusters for epithelium, stroma, tumor, necrosis, and dysplasia are distinct and consistent, reflecting the model’s high accuracy.

**
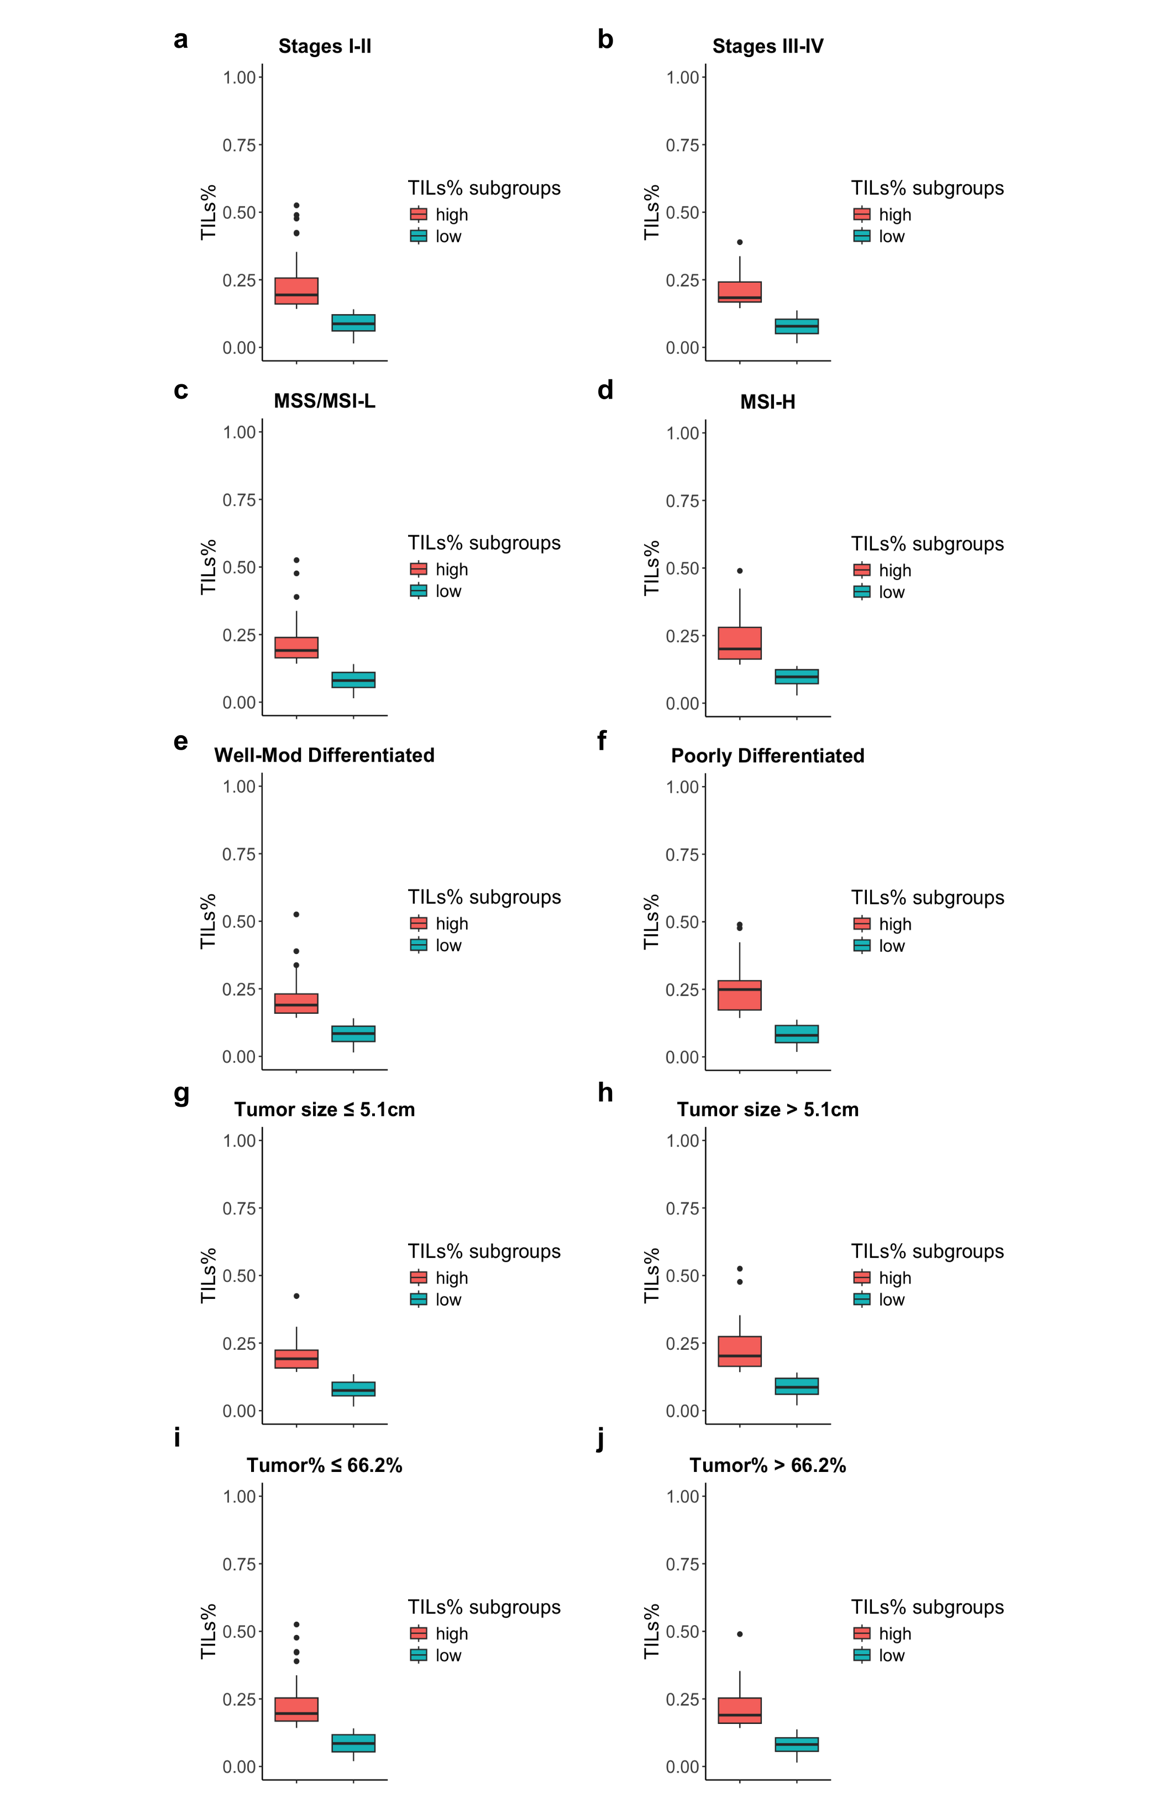
**

**Supplementary Data 2.** TILs% distribution in TCGA COAD dataset across clinical and pathological subgroups. Boxplots (a-h) display the distribution of TILs% across various subgroups in the TCGA COAD dataset, comparing samples with high and low TILs% with each subgroup.

**
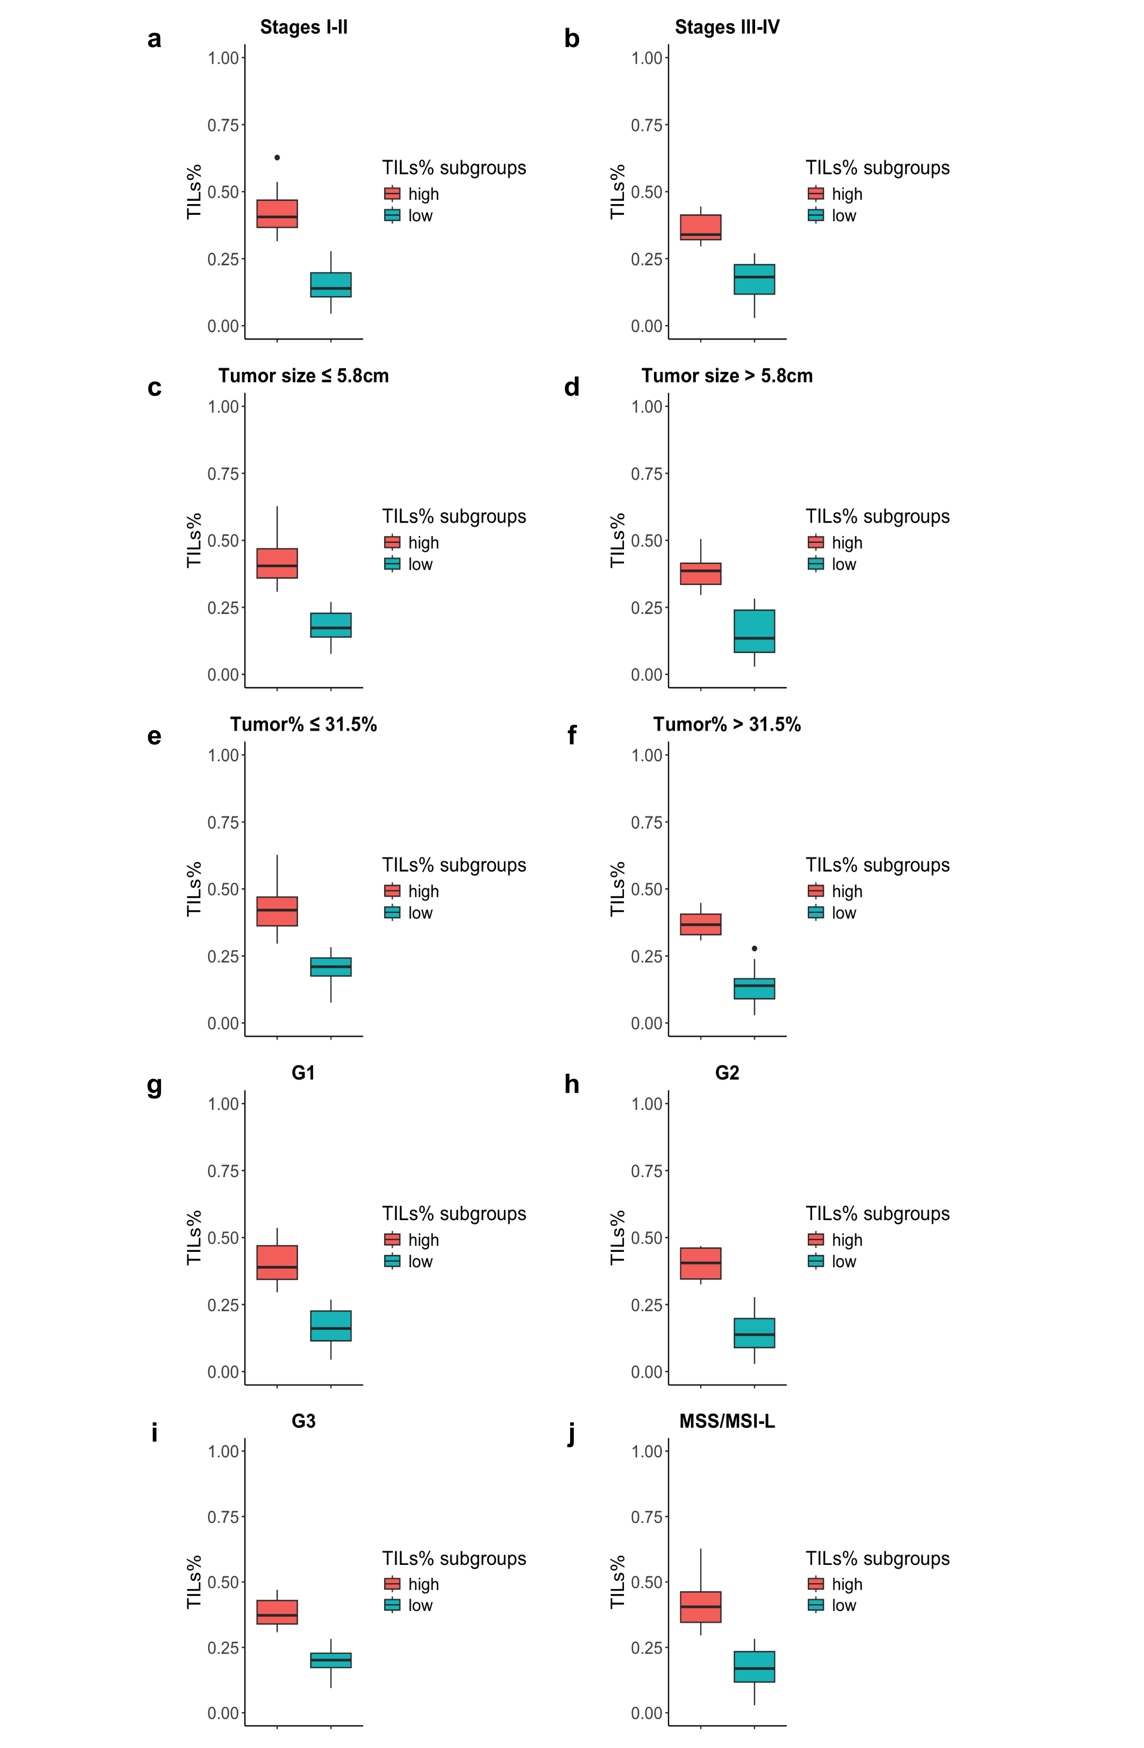
**

**Supplementary Data 3.** Comparison of high and low TILs% distribution in UKentucky dataset. Boxplots (a-j) illustrate the distribution of Tils% across AJCC stages, tumor size, tumor content, tumor budding score, and MSI status subgroups.

**
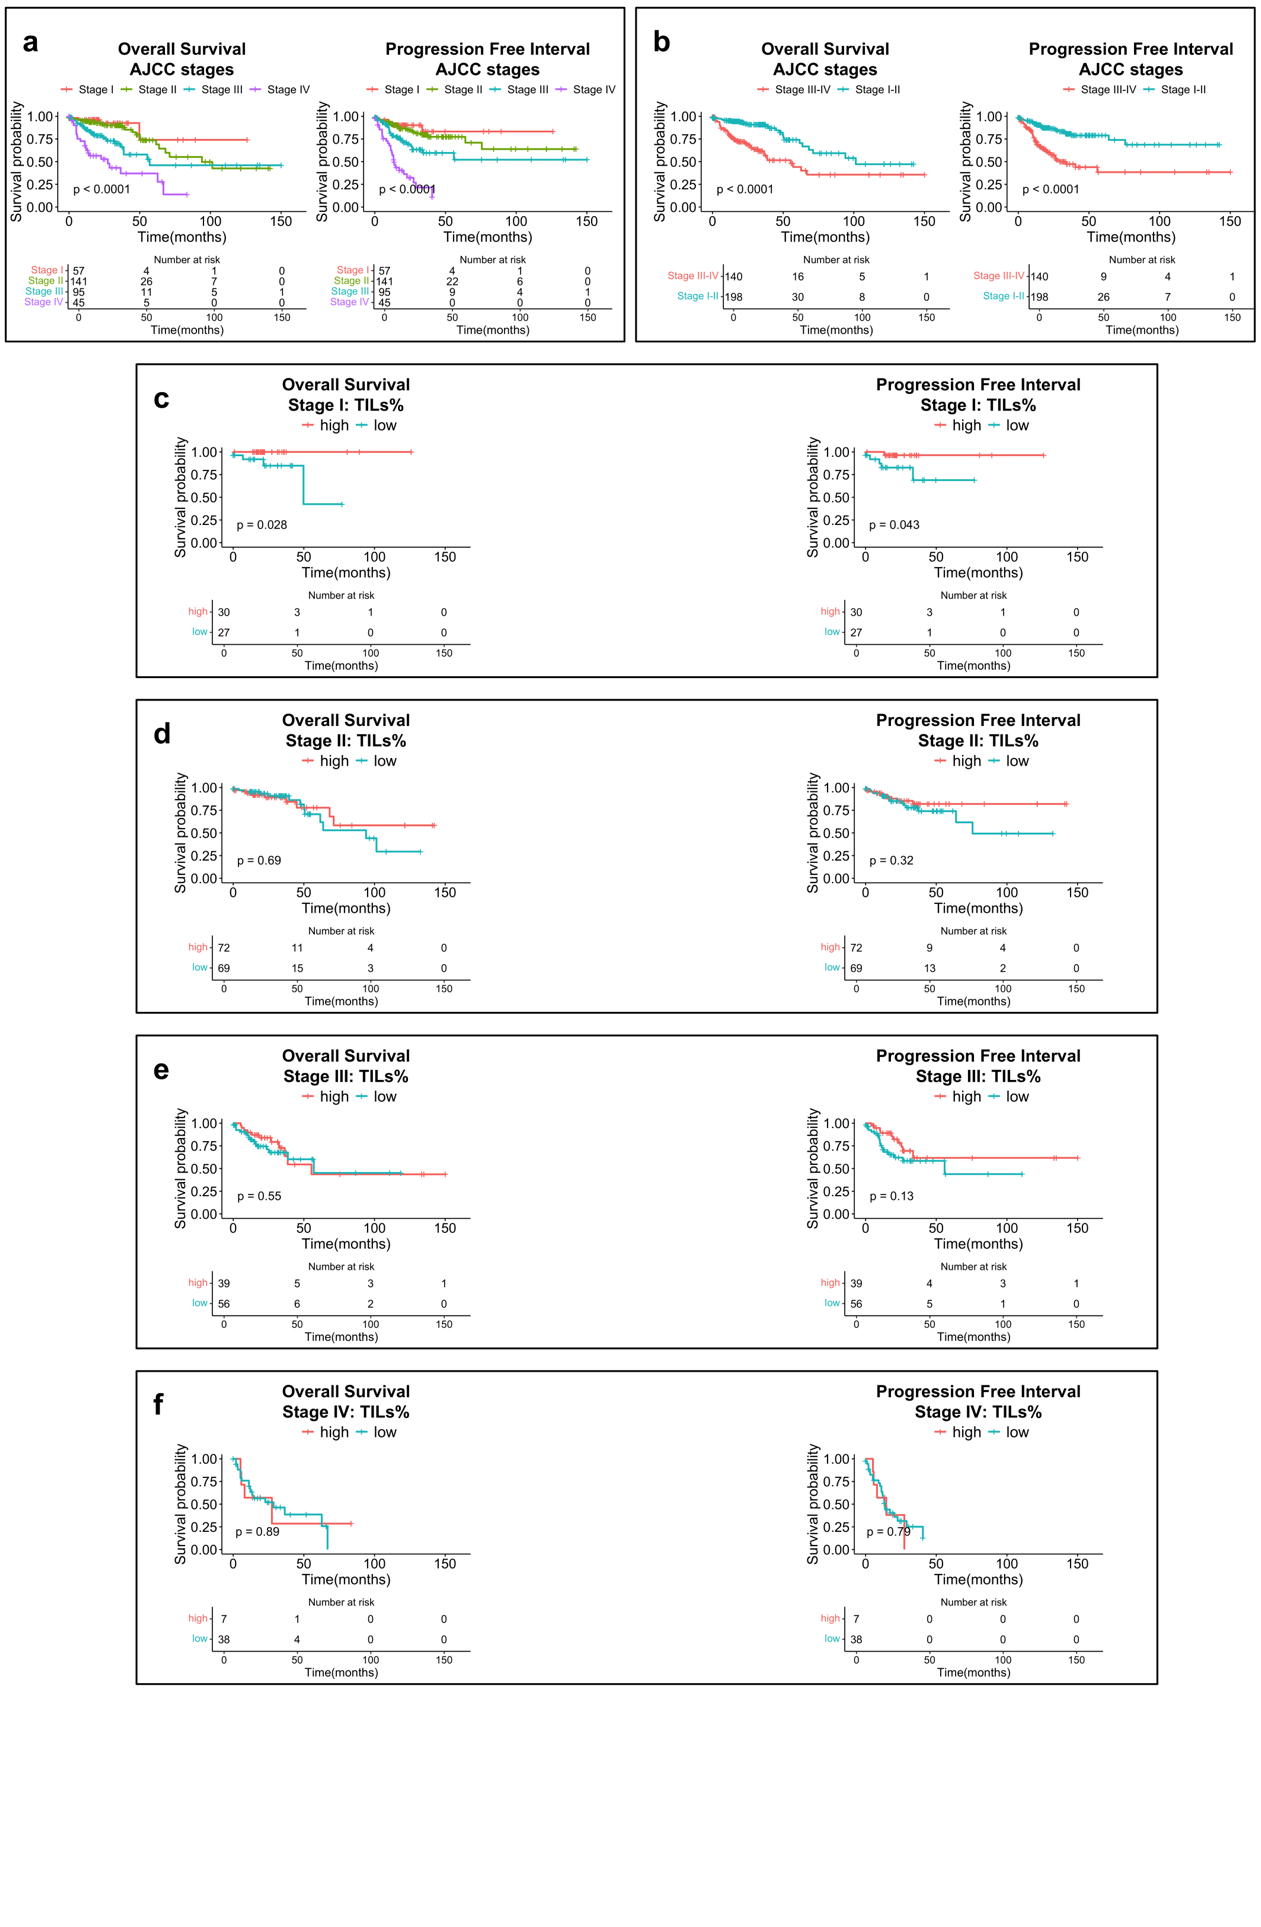
**

**Supplementary Data 4.** Kaplan-Meier curves for OS and PFI by AJCC stages and TILs% in TCGA COAD. a) Kaplan-Meier curves illustrate OS and PFI for individual AJCC stages (I, II, III, and IV), providing a detailed view of survival outcomes by each cancer stage. b) localized stages (I-II) versus metastatic stages (III-IV). c-f) TILs% analyses within individual AJCC stages: OS and PFI stratified by TILs% in each stage.

|  | **Table 1. Patient characteristics** | |  |
| --- | --- | --- | --- |
|  | Characteristics | TCGA COAD  N=347 |  |
|  | Immune subtypes |  |  |
|  | C1 | 249 (71.8%) |  |
|  | C2 | 69 (19.9%) |  |
|  | C3 | 8 (2.3%) |  |
|  | C4 | 7 (2.0%) |  |
|  | C5 | NA |  |
|  | C6 | 2 (0.6%) |  |

**Supplementary Data 5.** Demographics and clinicopathologic features of TCGA COAD dataset. C1 is characterized by a wound-healing phenotype, C2 exhibits an IFN-γ dominant profile, C3 represents an inflammatory subtype, C4 is defined by lymphocyte depletion, C5 is classified as immunologically quiet, and C6 is dominated by TGF-β signaling.

**
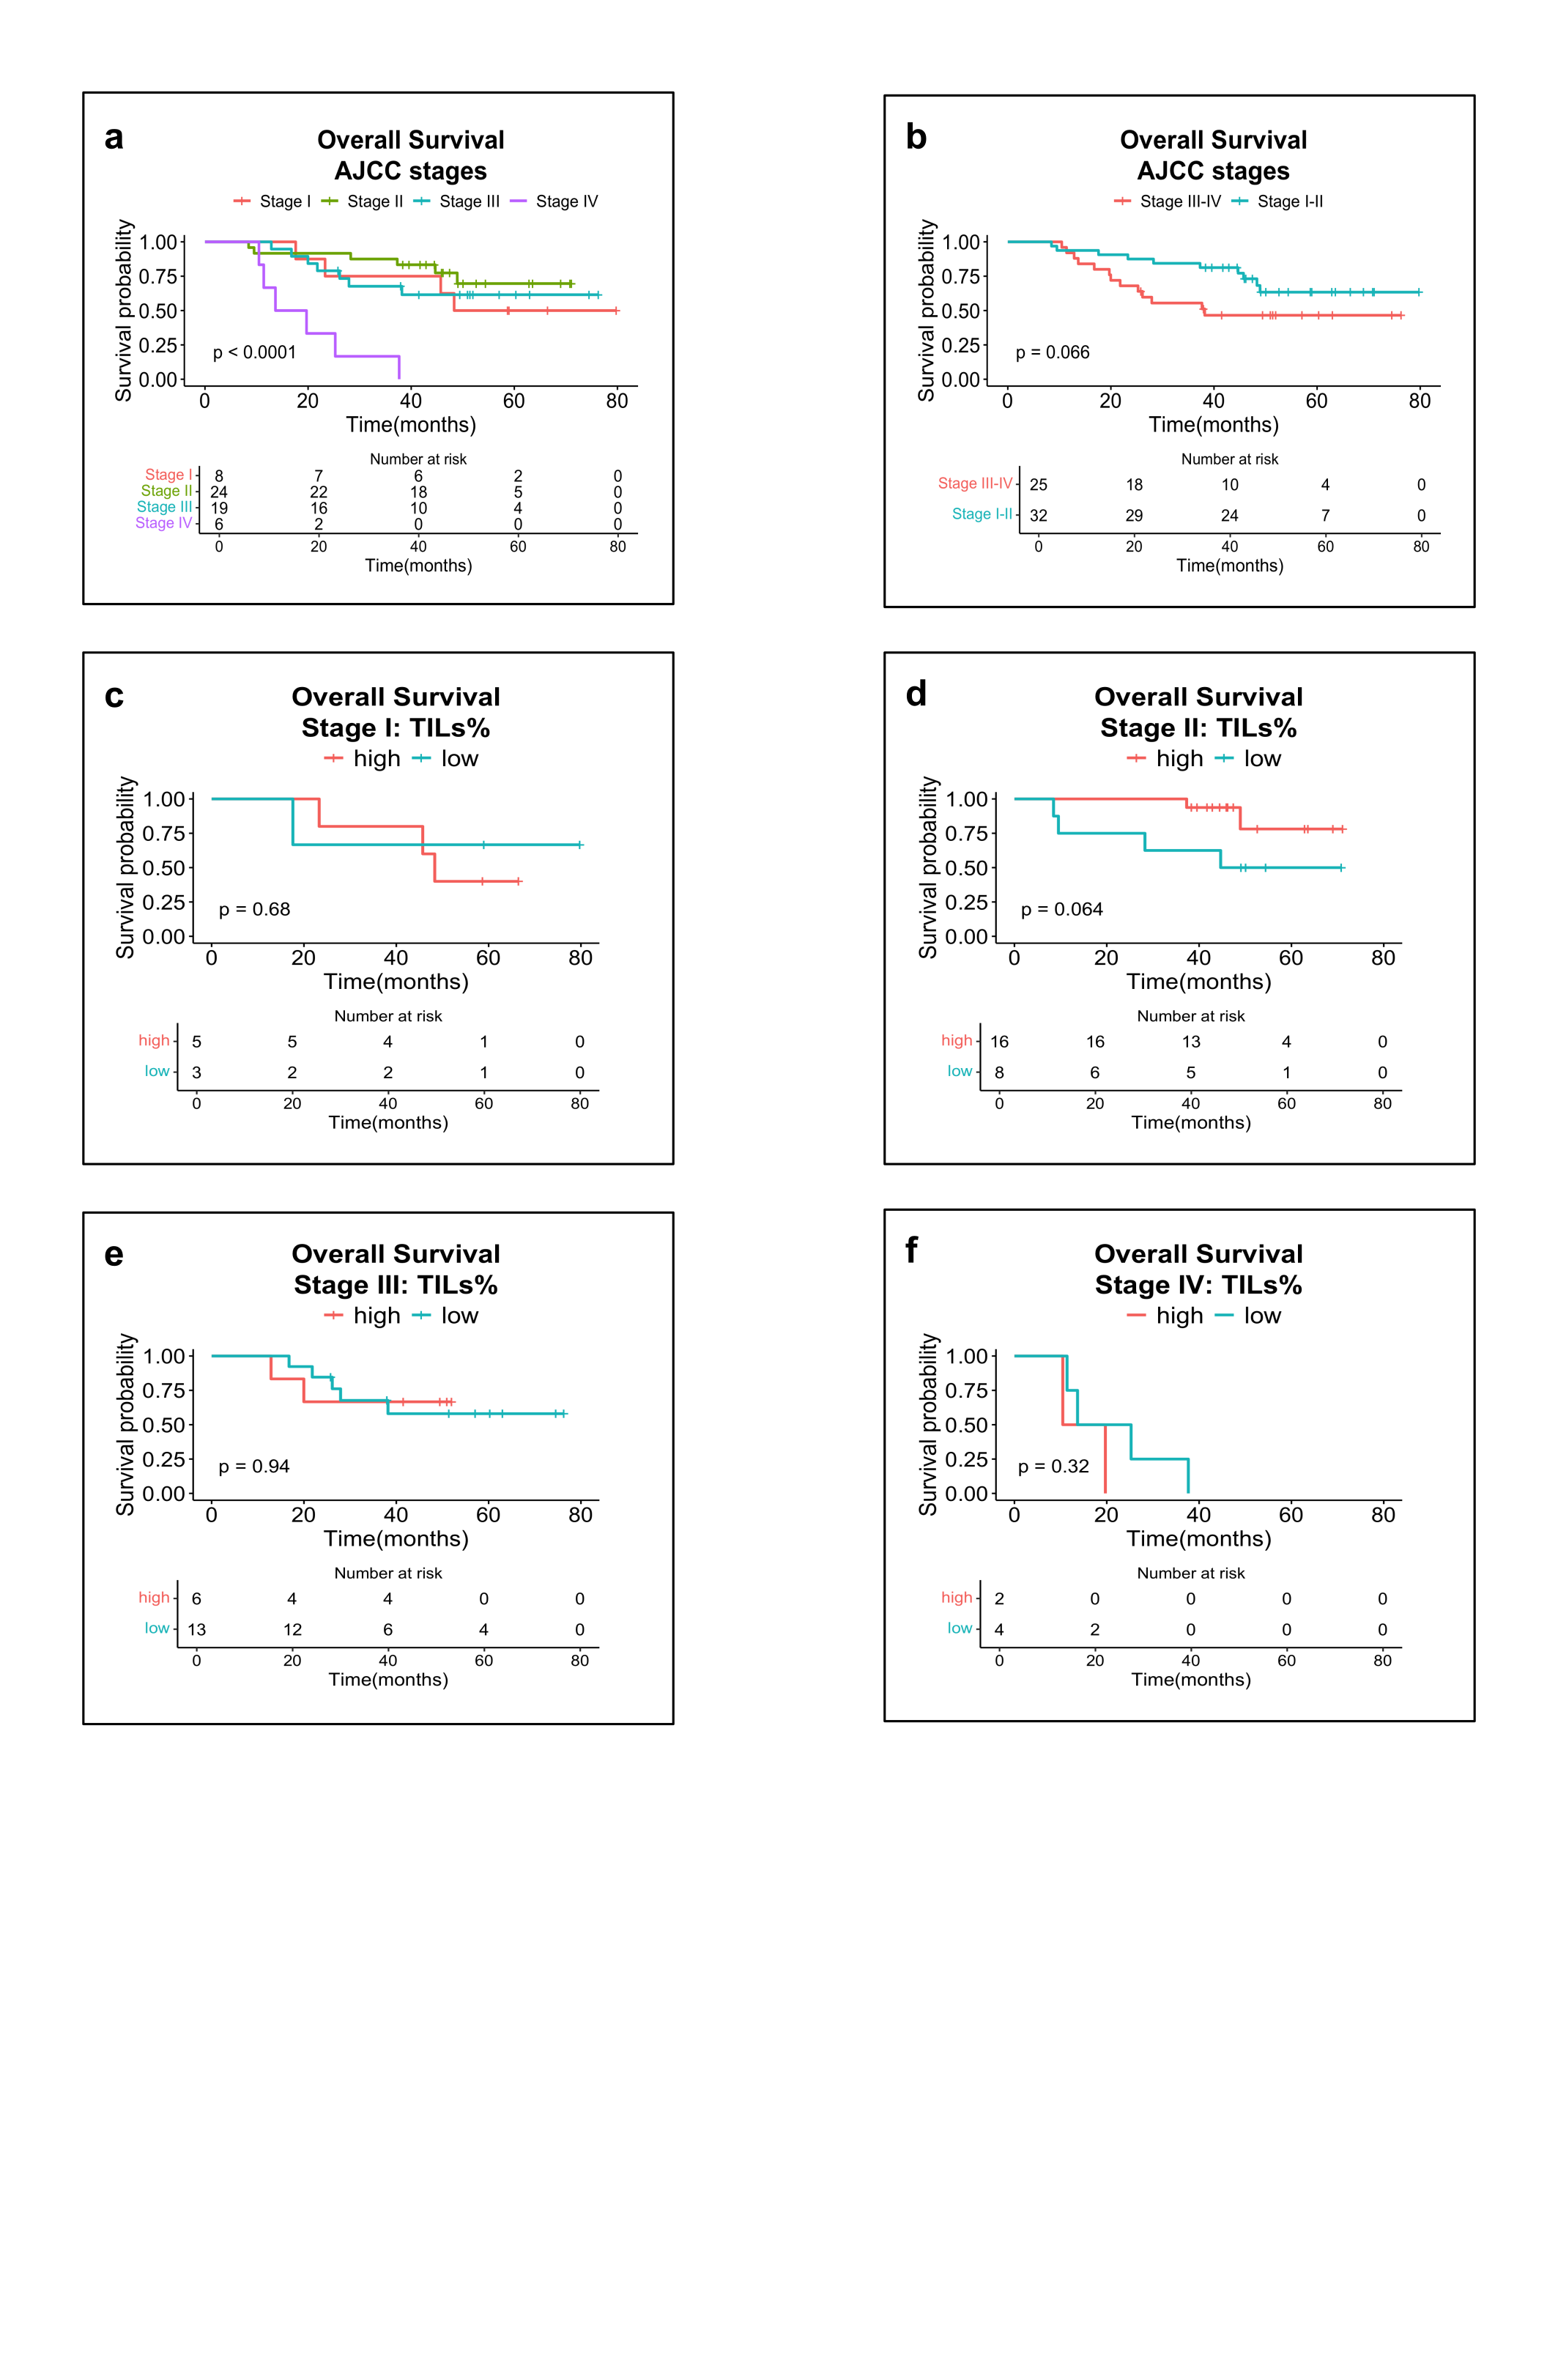
**

**Supplementary Data 6.** Kaplan-Meier survival curves showing survival probability by AJCC stages and TILs% across stages in UK dataset. a) OS by AJCC stages I, II, III, and IV. b) OS grouped as stages I-II versus III-IV. c-f) OS within each AJCC stage (I-IV) based on high vs. low TILs%.
